# Supplementary material for: Clonogenic, myogenic progenitors expressing MCAM/CD146 are incorporated as adventitial reticular cells in the microvascular compartment of human post-natal skeletal muscle
Source: PubMed Central journal article supplement (PMC5706678; doi:10.1371/journal.pone.0188844), 2017-11-29
Supplement: pone.0188844.s001.pdf [file pone.0188844.s001.pdf]

**S1 Table. Antibodies used for flow cytometry and fluorescence-activated cell sorting.**

| <b>Antigen</b>                         | <b>Type</b> | <b>Label</b> | <b>Clone/Cat#</b> | <b>Distributor</b> |
|----------------------------------------|-------------|--------------|-------------------|--------------------|
| <b>CD14 (LPS receptor)</b>             | MC          | PE           | M5E2              | BD Biosciences     |
| <b>CD31 (PECAM-1)</b>                  | MC          | PE           | WM59              | BD Biosciences     |
| <b>CD33 (P67)</b>                      | MC          | PECy5        | WM53              | BD Biosciences     |
| <b>CD34 (gp 105-120)</b>               | MC          | FITC         | 581               | BD Biosciences     |
| <b>CD38</b>                            | MC          | PE           | HIT2              | BD Biosciences     |
| <b>CD41a</b>                           | MC          | PE           | HIP8              | BD Biosciences     |
| <b>CD44</b>                            | MC          | PE           | 515               | BD Biosciences     |
| <b>CD45 (LCA, T200)</b>                | MC          | FITC         | HI30              | BD Biosciences     |
| <b>CD49a (VLA-1a, a1 integrin)</b>     | MC          | NC           | SR84              | BD Biosciences     |
| <b>CD56 (NCAM)</b>                     | MC          | PE           | MY31              | R&D Systems        |
| <b>CD56 (NCAM)</b>                     | MC          | APC          | B159              | BD Biosciences     |
| <b>CD61 (GP IIIa, b3 integrin)</b>     | MC          | FITC         | VI-PL2            | BD Biosciences     |
| <b>CD62E (E-Selectin)</b>              | MC          | FITC         | 1.2B6             | Chemicon           |
| <b>CD63 (LIMP, MLA1, gp55)</b>         | MC          | PE           | H5C6              | BD Biosciences     |
| <b>CD71 (T9, Transferrin receptor)</b> | MC          | PECy5        | M-A712            | BD Biosciences     |
| <b>CD80 (B7-1)</b>                     | MC          | FITC         | L307.4            | BD Biosciences     |
| <b>CD90 (Thy-1)</b>                    | MC          | PE           | 5E10              | BD Biosciences     |
| <b>CD105 (Endoglin)</b>                | MC          | NC           | 266               | BD Biosciences     |
| <b>CD117 (c-kit)</b>                   | MC          | PECy5        | YB5B8             | BD Biosciences     |
| <b>CD133 (AC133)</b>                   | MC          | NC           | 170411            | R&D Systems        |
| <b>CD140b (PDGF receptor beta)</b>     | MC          | NC           | 28                | BD Biosciences     |
| <b>CD144 (VE-cadherin, cadherin5)</b>  | MC          | PE           | TEA1/31           | Beckman Coulter    |
| <b>CD146 (MUC-18, MCAM)</b>            | MC          | PE           | P1H12             | BD Biosciences     |
| <b>ALP (alkaline phosphatase)</b>      | MC          | NC           | B4-78             | R&D Systems        |
| <b>KDR (Flk-1, VEGF R2)</b>            | MC          | APC          | 89106             | R&D Systems        |

MC, mouse monoclonal; PE, phycoerythrin; FITC, fluorescein isothiocyanate; NC, non-conjugated; APC, allophycocyanin; PECy5, Phycoerythrin-Cy5
