# Supplementary material for: Clonogenic, myogenic progenitors expressing MCAM/CD146 are incorporated as adventitial reticular cells in the microvascular compartment of human post-natal skeletal muscle
Source: PubMed Central journal article supplement (PMC5706678; doi:10.1371/journal.pone.0188844), 2017-11-29
Supplement: pone.0188844.s002.pdf [file pone.0188844.s002.pdf]

**S2 Table. Antibodies used for immunohistochemistry and immunocytochemistry**

| <b>Antigen</b>         | <b>Type</b> | <b>Clone</b>          | <b>Cat#</b>  | <b>Distributor</b>                      |
|------------------------|-------------|-----------------------|--------------|-----------------------------------------|
| <b>HuCD146(MCAM)</b>   | MC          | Clone N1238 IgG1      | NCL-CD146    | Novocastra                              |
| <b>Hu CD56 (NCAM)</b>  | MC          | Clone CD564 IgG2b     | NCL-CD56-504 | Novocastra                              |
| <b>HuCD34</b>          | MC          | Clone QBEnd/10 IgG1   | NCL-END      | Novocastra                              |
| <b>MyHC (MF20)</b>     | MC          | IgG2b                 | -----        | Hybridoma<br>Bank DSHB , NIH            |
| <b>Hu Lamin A/C</b>    | MC          | Clone 636 IgG2b       | NCL-LAM-A/C  | Novocastra                              |
| <b>Hu Spectrin</b>     | MC          | Clone RBC2/3D5 IgG2b  | NCL-SPEC1    | Novocastra                              |
| <b>Myf-5</b>           | PC          | -----                 | SC-302       | Santa Cruz Biotech                      |
| <b>Desmin</b>          | MC          | Clone D33 IgG1        | MO760        | Dako                                    |
| <b>ALP (LF-47)</b>     | PC          | -----                 | -----        | Gift from L.W.<br>Fisher, NIDCR,<br>NIH |
| <b>PAX-7</b>           | MM          | IgG1                  | -----        | Hybridoma<br>Bank, DSHB, NIH            |
| <b>PAX-3</b>           | MC          | IgG2a                 | -----        | Hybridoma<br>Bank, DSHB, NIH            |
| <b>Laminin</b>         | PC          | -----                 | L9393        | Sigma                                   |
| <b>Hu Dystrophin 3</b> | MC          | Clone Dy10/12B2 IgG2a | NCL-DYS3     | Novocastra                              |

MC, mouse monoclonal; PC, rabbit polyclonal antiserum
